# Supplementary material
Source: publisher figshare collection journal article supplement (https://acs.figshare.com/ndownloader/files/4049074)

# checkCIF/PLATON report

You have not supplied any structure factors. As a result the full set of tests cannot be run.

No syntax errors found.      CIF dictionary      Interpreting this report

## Datablock: I

---

Bond precision:    C-C = 0.0131 A                      Wavelength=0.71073

Cell:              a=9.370(4)                      b=12.462(6)                      c=16.242(7)  
                    alpha=102.593(9)                      beta=95.875(8)                      gamma=105.085(8)

Temperature:      293 K

|                | Calculated                | Reported         |
|----------------|---------------------------|------------------|
| Volume         | 1761.5(14)                | 1761.5(13)       |
| Space group    | P -1                      | P-1              |
| Hall group     | -P 1                      | ?                |
| Moiety formula | C37 H26 Co N5 O4, 2(H2 O) | ?                |
| Sum formula    | C37 H30 Co N5 O6          | C37 H30 Co N5 O6 |
| Mr             | 699.59                    | 699.59           |
| Dx,g cm-3      | 1.319                     | 1.319            |
| Z              | 2                         | 2                |
| Mu (mm-1)      | 0.539                     | 0.539            |
| F000           | 724.0                     | 724.0            |
| F000'          | 724.99                    |                  |
| h,k,lmax       | 11,14,19                  | 11,14,19         |
| Nref           | 6206                      | 6040             |
| Tmin,Tmax      | 0.908,0.953               | 0.891,0.953      |
| Tmin'          | 0.888                     |                  |

Correction method= MULTI-SCAN

Data completeness= 0.973                      Theta(max)= 25.000

R(reflections)= 0.0874( 3687)                      wR2(reflections)= 0.1577( 6040)

S = 1.004                                      Npar= 454

---

The following ALERTS were generated. Each ALERT has the format

**test-name\_ALERT\_alert-type\_alert-level.**

Click on the hyperlinks for more details of the test.

---

### Alert level A

|                              |                                    |             |
|------------------------------|------------------------------------|-------------|
| PLAT213_ALERT_2_A Atom C11   | has ADP max/min Ratio .....        | 5.2 prola   |
| PLAT213_ALERT_2_A Atom C15   | has ADP max/min Ratio .....        | 6.7 prola   |
| PLAT241_ALERT_2_A Check High | Ueq as Compared to Neighbors for   | C15         |
| PLAT245_ALERT_2_A U(iso) H3W | Smaller than U(eq) O2W      by ... | 0.126 AngSq |

|                   |                                                |                        |        |       |           |
|-------------------|------------------------------------------------|------------------------|--------|-------|-----------|
| PLAT245_ALERT_2_A | U(iso) H4W                                     | Smaller than U(eq) O2W | by ... | 0.126 | AngSq     |
| PLAT415_ALERT_2_A | Short Inter D-H..H-X                           | H1W                    | .. H16 | ..    | 1.73 Ang. |
| PLAT417_ALERT_2_A | Short Inter D-H..H-D                           | H2W                    | .. H4W | ..    | 1.45 Ang. |
| PLAT601_ALERT_2_A | Structure Contains Solvent Accessible VOIDS of |                        |        | 279   | A**3      |

---

**Alert level B**

|                   |                      |                       |                     |     |           |
|-------------------|----------------------|-----------------------|---------------------|-----|-----------|
| PLAT213_ALERT_2_B | Atom C7              | has ADP max/min Ratio | ....                | 4.3 | prola     |
| PLAT213_ALERT_2_B | Atom C9              | has ADP max/min Ratio | ....                | 4.2 | prola     |
| PLAT213_ALERT_2_B | Atom C10             | has ADP max/min Ratio | ....                | 4.3 | prola     |
| PLAT220_ALERT_2_B | Large Non-Solvent    | C                     | Ueq(max)/Ueq(min)   | ... | 8.6 Ratio |
| PLAT222_ALERT_3_B | Large Non-Solvent    | H                     | Uiso(max)/Uiso(min) | ..  | 7.7 Ratio |
| PLAT420_ALERT_2_B | D-H Without Acceptor | O2W                   | - H3W               | ... | ?         |

---

**Alert level C**

|                   |                                             |                                  |        |        |           |
|-------------------|---------------------------------------------|----------------------------------|--------|--------|-----------|
| PLAT029_ALERT_3_C | _diffn_measured_fraction_theta_full         | Low                              | .....  | 0.979  |           |
| PLAT048_ALERT_1_C | MoietyFormula                               | Not Given                        | .....  | ?      |           |
| PLAT125_ALERT_4_C | No '_symmetry_space_group_name_Hall'        | Given                            | ....   | ?      |           |
| PLAT213_ALERT_2_C | Atom N3                                     | has ADP max/min Ratio            | ....   | 3.4    | prola     |
| PLAT213_ALERT_2_C | Atom C5                                     | has ADP max/min Ratio            | ....   | 4.0    | prola     |
| PLAT213_ALERT_2_C | Atom C6                                     | has ADP max/min Ratio            | ....   | 3.5    | prola     |
| PLAT213_ALERT_2_C | Atom C8                                     | has ADP max/min Ratio            | ....   | 3.2    | prola     |
| PLAT213_ALERT_2_C | Atom C12                                    | has ADP max/min Ratio            | ....   | 3.7    | prola     |
| PLAT213_ALERT_2_C | Atom C13                                    | has ADP max/min Ratio            | ....   | 3.3    | prola     |
| PLAT213_ALERT_2_C | Atom C14                                    | has ADP max/min Ratio            | ....   | 3.6    | prola     |
| PLAT241_ALERT_2_C | Check High                                  | Ueq as Compared to Neighbors for |        | C6     |           |
| PLAT241_ALERT_2_C | Check High                                  | Ueq as Compared to Neighbors for |        | C11    |           |
| PLAT241_ALERT_2_C | Check High                                  | Ueq as Compared to Neighbors for |        | C12    |           |
| PLAT241_ALERT_2_C | Check High                                  | Ueq as Compared to Neighbors for |        | C14    |           |
| PLAT241_ALERT_2_C | Check High                                  | Ueq as Compared to Neighbors for |        | C28    |           |
| PLAT241_ALERT_2_C | Check High                                  | Ueq as Compared to Neighbors for |        | C34    |           |
| PLAT242_ALERT_2_C | Check Low                                   | Ueq as Compared to Neighbors for |        | C10    |           |
| PLAT242_ALERT_2_C | Check Low                                   | Ueq as Compared to Neighbors for |        | C13    |           |
| PLAT245_ALERT_2_C | U(iso) H1W                                  | Smaller than U(eq) O1W           | by ... | 0.049  | AngSq     |
| PLAT245_ALERT_2_C | U(iso) H2W                                  | Smaller than U(eq) O1W           | by ... | 0.049  | AngSq     |
| PLAT250_ALERT_2_C | Large U3/U1 Ratio for Average U(i,j) Tensor | ....                             |        | 4.0    |           |
| PLAT341_ALERT_3_C | Low Bond Precision on C-C Bonds             | .....                            |        | 0.0131 | Ang       |
| PLAT366_ALERT_2_C | Short? C(sp?)-C(sp?) Bond                   | C12 - C13                        | ...    | 1.34   | Ang.      |
| PLAT366_ALERT_2_C | Short? C(sp?)-C(sp?) Bond                   | C13 - C14                        | ...    | 1.34   | Ang.      |
| PLAT410_ALERT_2_C | Short Intra H...H Contact                   | H8                               | .. H15 | ..     | 1.99 Ang. |

---

**Alert level G**

|                   |                                                  |       |
|-------------------|--------------------------------------------------|-------|
| PLAT002_ALERT_2_G | Number of Distance or Angle Restraints on AtSite | 6     |
| PLAT004_ALERT_5_G | Info: Polymeric Structure Found with Dimension   | 3     |
| PLAT005_ALERT_5_G | No _iucr_refine_instructions_details in the CIF  | ?     |
| PLAT072_ALERT_2_G | SHELXL First Parameter in WGHT Unusually Large.  | 0.20  |
| PLAT199_ALERT_1_G | Check the Reported _cell_measurement_temperature | 293 K |
| PLAT200_ALERT_1_G | Check the Reported _diffn_ambient_temperature    | 293 K |
| PLAT343_ALERT_2_G | Check sp? Angle Range in Main Residue for        | C13   |
| PLAT860_ALERT_3_G | Note: Number of Least-Squares Restraints         | 6     |

---

8 **ALERT level A** = Most likely a serious problem - resolve or explain  
6 **ALERT level B** = A potentially serious problem, consider carefully  
25 **ALERT level C** = Check. Ensure it is not caused by an omission or oversight  
8 **ALERT level G** = General information/check it is not something unexpected

3 ALERT type 1 CIF construction/syntax error, inconsistent or missing data

37 ALERT type 2 Indicator that the structure model may be wrong or deficient  
4 ALERT type 3 Indicator that the structure quality may be low  
1 ALERT type 4 Improvement, methodology, query or suggestion  
2 ALERT type 5 Informative message, check

---

## checkCIF publication errors

---

### Alert level A

PUBL004\_ALERT\_1\_A The contact author's name and address are missing,  
\_publ\_contact\_author\_name and \_publ\_contact\_author\_address.  
PUBL005\_ALERT\_1\_A \_publ\_contact\_author\_email, \_publ\_contact\_author\_fax and  
\_publ\_contact\_author\_phone are all missing.  
At least one of these should be present.  
PUBL006\_ALERT\_1\_A \_publ\_requested\_journal is missing  
e.g. 'Acta Crystallographica Section C'  
PUBL008\_ALERT\_1\_A \_publ\_section\_title is missing. Title of paper.  
PUBL009\_ALERT\_1\_A \_publ\_author\_name is missing. List of author(s) name(s).  
PUBL010\_ALERT\_1\_A \_publ\_author\_address is missing. Author(s) address(es).  
PUBL012\_ALERT\_1\_A \_publ\_section\_abstract is missing.  
Abstract of paper in English.

---

### Alert level G

PUBL013\_ALERT\_1\_G The \_publ\_section\_comment (discussion of study) is  
missing. This is required for a full paper submission (but is  
optional for an electronic paper).  
PUBL017\_ALERT\_1\_G The \_publ\_section\_references section is missing or  
empty.

---

7 **ALERT level A** = Data missing that is essential or data in wrong format  
2 **ALERT level G** = General alerts. Data that may be required is missing

---

## Publication of your CIF

You should attempt to resolve as many as possible of the alerts in all categories. Often the minor alerts point to easily fixed oversights, errors and omissions in your CIF or refinement strategy, so attention to these fine details can be worthwhile. In order to resolve some of the more serious problems it may be necessary to carry out additional measurements or structure refinements. However, the nature of your study may justify the reported deviations from journal submission requirements and the more serious of these should be commented upon in the discussion or experimental section of a paper or in the "special\_details" fields of the CIF. *checkCIF* was carefully designed to identify outliers and unusual parameters, but every test has its limitations and alerts that are not important in a particular case may appear. Conversely, the absence of alerts does not guarantee there are no aspects of the results needing attention. It is up to the individual to critically assess their own results and, if necessary, seek expert advice.

If level A alerts remain, which you believe to be justified deviations, and you intend to submit this CIF for publication in Acta Crystallographica Section C or Section E, you should additionally insert an explanation in your CIF using the Validation Reply Form (VRF) below. Your explanation will be considered as part of the review process.

If you intend to submit to another section of Acta Crystallographica or Journal of Applied Crystallography or Journal of Synchrotron Radiation, you should make sure that at least a basic structural check is run on the final version of your CIF prior to submission.

```
# start Validation Reply Form
_vrf_PUBL004_GLOBAL
;
PROBLEM: The contact author's name and address are missing,
RESPONSE: ...
;
_vrf_PUBL005_GLOBAL
;
PROBLEM: _publ_contact_author_email, _publ_contact_author_fax and
RESPONSE: ...
;
_vrf_PUBL006_GLOBAL
;
PROBLEM: _publ_requested_journal is missing
RESPONSE: ...
;
_vrf_PUBL008_GLOBAL
;
PROBLEM: _publ_section_title is missing. Title of paper.
RESPONSE: ...
;
_vrf_PUBL009_GLOBAL
;
PROBLEM: _publ_author_name is missing. List of author(s) name(s).
RESPONSE: ...
;
_vrf_PUBL010_GLOBAL
;
PROBLEM: _publ_author_address is missing. Author(s) address(es).
RESPONSE: ...
;
_vrf_PUBL012_GLOBAL
;
PROBLEM: _publ_section_abstract is missing.
```

```

RESPONSE: ...
;
_vrf_PLAT213_I
;
PROBLEM: Atom C11          has ADP max/min Ratio .....      5.2 prola
RESPONSE: ...
;
_vrf_PLAT241_I
;
PROBLEM: Check High      Ueq as Compared to Neighbors for      C15
RESPONSE: ...
;
_vrf_PLAT245_I
;
PROBLEM: U(iso) H3W      Smaller than U(eq) O2W      by ...      0.126 AngSq
RESPONSE: ...
;
_vrf_PLAT415_I
;
PROBLEM: Short Inter D-H..H-X      H1W      ..      H16      ..      1.73 Ang.
RESPONSE: ...
;
_vrf_PLAT417_I
;
PROBLEM: Short Inter D-H..H-D      H2W      ..      H4W      ..      1.45 Ang.
RESPONSE: ...
;
_vrf_PLAT601_I
;
PROBLEM: Structure Contains Solvent Accessible VOIDS of .      279 A**3
RESPONSE: ...
;
# end Validation Reply Form

```

If you wish to submit your CIF for publication in Acta Crystallographica Section C or E, you should upload your CIF via the web. If your CIF is to form part of a submission to another IUCr journal, you will be asked, either during electronic submission or by the Co-editor handling your paper, to upload your CIF via our web site.

---

**PLATON version of 05/11/2012; check.def file version of 05/11/2012**

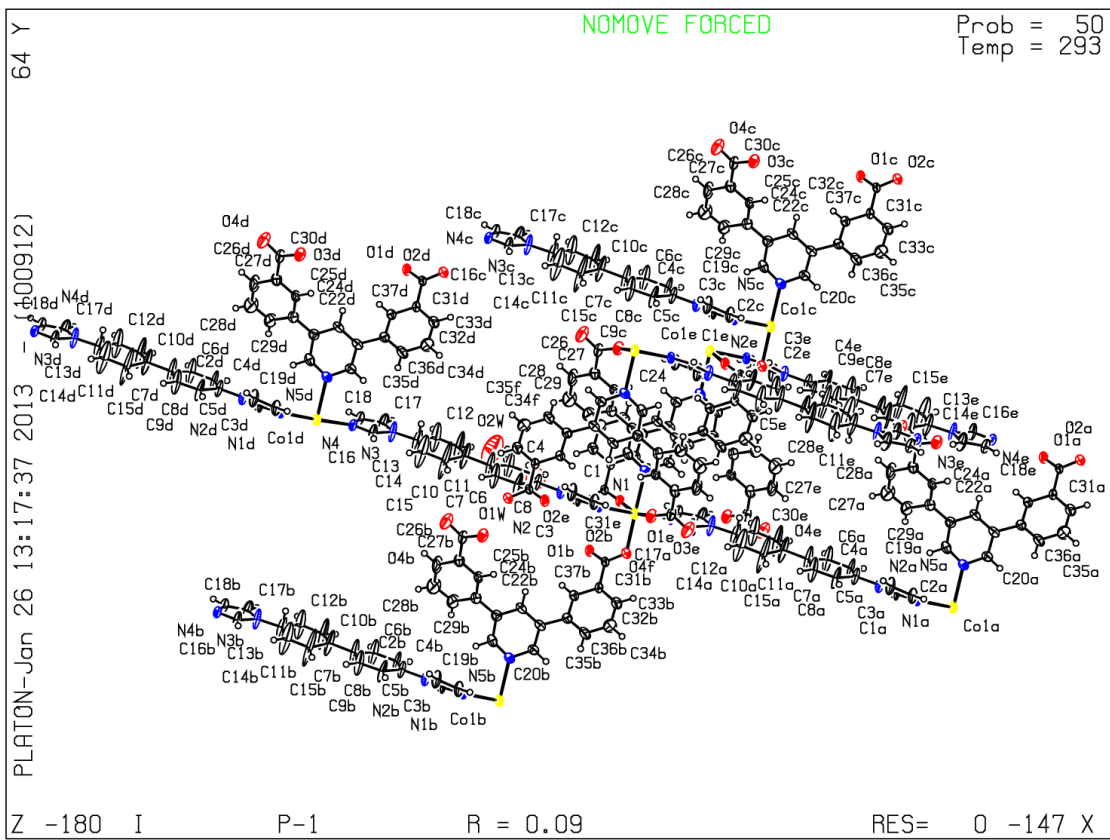

Supplement: Supplementary file 1 [file 4049074]
